# Supplementary material for: Acute Normobaric Hypoxia Lowers Executive Functions among Young Men despite Increase of BDNF Concentration
Source: MDPI journal article supplement (doi:10.3390/ijerph191710802), 2022-08-30
Supplement: s1 [file s1]

**Table S1.** Results of the Mixed-Model ANOVA.

|                                          | <b>Fixed Effects (Type III)</b> | <b>F</b> |
|------------------------------------------|---------------------------------|----------|
| <b>BDNF</b>                              |                                 |          |
| Row Factor                               | 0.0086                          | 7.358    |
| Time                                     | 0.0499                          | 3.999    |
| Row Factor x Time                        | 0.0529                          | 3.893    |
| Chi-square, df                           | 0.4329, 1                       |          |
|                                          |                                 |          |
| <b>Cortisol</b>                          |                                 |          |
| Row Factor                               | 0.0011                          | 11.71    |
| Time                                     | 0.0001                          | 16.61    |
| Row Factor x Time                        | <0.0001                         | 35.90    |
| Chi-square, df                           | 30.42, 1                        |          |
|                                          |                                 |          |
| <b>Stroop “reading”<br/>interference</b> |                                 |          |
| Row Factor                               | 0.6097                          | 0.2634   |
| Time                                     | 0.9457                          | 0.004675 |
| Row Factor x Time                        | 0.9387                          | 0.005959 |
| Chi-square, df                           | 2.282, 1                        |          |
|                                          |                                 |          |
| <b>Stroop “naming”<br/>interference</b>  |                                 |          |
| Row Factor                               | 0.3213                          | 1.000    |
| Time                                     | 0.0142                          | 6.375    |
| Row Factor x Time                        | 0.0352                          | 4.644    |
| Chi-square, df                           | 12.53, 1                        |          |
